# Supplementary material for: Modelling the links between farm characteristics, respiratory health and pig production traits
Source: PubMed Central journal article supplement (PMC8253804; doi:10.1038/s41598-021-93027-9), 2021-07-02
Supplement: 41598_2021_93027_MOESM1_ESM.pdf [file 41598_2021_93027_MOESM1_ESM.pdf]

## 1. Farm characteristics

|                   |                                                                              |
|-------------------|------------------------------------------------------------------------------|
| Farm name:        |                                                                              |
| Contact person:   | Farm owner / manager / herdsman (delete as appropriate)                      |
| Farm postcode:    |                                                                              |
| Email:            |                                                                              |
| CPH Number (s):   |                                                                              |
| Farm assurance    | Red Tractor – Number:<br>Other (please state):<br>None:                      |
| Herdmark:         |                                                                              |
| Private vet name: | Specialist pig vet? Yes <input type="checkbox"/> No <input type="checkbox"/> |
| Staff onsite:     | Number full-time: _____ Number part-time: _____                              |

1.1. How many pigs in total are kept on this site? .....

1.2. What is the type of production on the farm?

| Production type                                             |                      | Yes | No |
|-------------------------------------------------------------|----------------------|-----|----|
| <b>Breeder unit</b>                                         |                      |     |    |
| <b>Farrow-to-finish unit</b>                                |                      |     |    |
| <b>Weaning to finishing unit</b>                            |                      |     |    |
| Over the last year, on average, each batch was supplied by: | Single breeding unit |     |    |
|                                                             | 2 breeding units     |     |    |
|                                                             | 3 breeding units     |     |    |
|                                                             | >3 breeding units    |     |    |
| <b>Grower to finishing unit</b>                             |                      |     |    |
| Over the last year, on average, each batch was supplied by: | Single weaner unit   |     |    |
|                                                             | 2 weaner units       |     |    |
|                                                             | 3 weaner units       |     |    |
|                                                             | >3 weaner units      |     |    |

- 1.3. Select the closest description of the **predominant** type of accommodation for each applicable stage of production (please tick only one box for each age-group).

| Accommodation type                         | Dry Sows | Weaners | Growers | Finishers |
|--------------------------------------------|----------|---------|---------|-----------|
| Fully slatted                              |          |         |         |           |
| Part slatted                               |          |         |         |           |
| Kennel (with bedding) + <b>indoor</b> run  |          |         |         |           |
| Kennel (with bedding) + <b>outdoor</b> run |          |         |         |           |
| Kennel (no bedding) + <b>indoor</b> run    |          |         |         |           |
| Kennel (no bedding) + <b>outdoor</b> run   |          |         |         |           |
| Straw yards                                |          |         |         |           |
| Outdoor                                    |          |         |         |           |
| Other (please specify below)               |          |         |         |           |

- 1.4. What age is the predominant type of accommodation for each stage and number of pig places in each stage (leave box blank if stage not present on your site):

| Accommodation type   | Dry Sows | Farrowing | Weaners | Growers | Finishers |
|----------------------|----------|-----------|---------|---------|-----------|
| Age (years)          |          |           |         |         |           |
| Number of pig places |          |           |         |         |           |

- 1.5. Tick type of ventilation in use in the predominant type of accommodation for each stage (leave box blank if stage not present on your site):

| Feature                | Dry Sows | Farrowing | Weaners | Growers | Finishers |
|------------------------|----------|-----------|---------|---------|-----------|
| Assisted ventilation   |          |           |         |         |           |
| Natural ventilation    |          |           |         |         |           |
| Other, please specify: |          |           |         |         |           |

1.6. Do you have an All-in All-out (AIAO) system currently operating on the site?

Yes  No

1.6.1. If an AIAO system is used: How is it implemented (please tick appropriate boxes):

|                                                                          | Farrowing | Weaners | Growers | Finishers |
|--------------------------------------------------------------------------|-----------|---------|---------|-----------|
| AIAO by pen                                                              |           |         |         |           |
| AIAO by room                                                             |           |         |         |           |
| AIAO by building                                                         |           |         |         |           |
| AIAO by paddock                                                          |           |         |         |           |
| Approximate downtime (days) between pigs leaving and next batch entering |           |         |         |           |
| Wash down between batches?                                               |           |         |         |           |
| Disinfection between batches?                                            |           |         |         |           |

1.6.2. Feeding regime (please tick appropriate box):

|           | Dry feed | Wet feed | Home - Mix | Purchased Compound | By-product |
|-----------|----------|----------|------------|--------------------|------------|
| Dry sows  |          |          |            |                    |            |
| Farrowing |          |          |            |                    |            |
| Weaners   |          |          |            |                    |            |
| Growers   |          |          |            |                    |            |
| Finishers |          |          |            |                    |            |

## 2. Health/Disease Questions

2.1. Have you had any of the following types of disease problem at any time on the farm in the two-year period from January 2016 to December 2017?

| Disease description                      | In 2016-17<br><i>please tick one box</i> |               |                                 | What type of pigs were most affected in<br>2016-17 <i>please tick all that apply</i> |                |           |                     |
|------------------------------------------|------------------------------------------|---------------|---------------------------------|--------------------------------------------------------------------------------------|----------------|-----------|---------------------|
|                                          | Not seen                                 | Minor problem | Main or sometimes major problem | Sucking pigs                                                                         | Weaner/growers | Finishers | Adult breeding pigs |
| 2.1.1 Diarrhoea/scour                    |                                          |               |                                 |                                                                                      |                |           |                     |
| 2.1.2 Respiratory disease e.g. Coughing  |                                          |               |                                 |                                                                                      |                |           |                     |
| 2.1.3 Nervous signs e.g. Meningitis-type |                                          |               |                                 |                                                                                      |                |           |                     |
| 2.1.4 Lameness                           |                                          |               |                                 |                                                                                      |                |           |                     |
| 2.1.5 Wasting                            |                                          |               |                                 |                                                                                      |                |           |                     |
| 2.1.6 Skin disease                       |                                          |               |                                 |                                                                                      |                |           |                     |
| 2.1.7 Sudden or rapid deaths             |                                          |               |                                 |                                                                                      |                |           |                     |
| 2.1.8 Reproductive problems              |                                          |               |                                 |                                                                                      |                |           |                     |
| 2.1.9 Other (please specify)             |                                          |               |                                 |                                                                                      |                |           |                     |

2.2. What vaccines have been used in pigs on your unit in 2016 and 2017?

| Vaccine                                                    | Rearing pigs<br><i>please tick</i> | Breeding pigs<br><i>please tick</i> |
|------------------------------------------------------------|------------------------------------|-------------------------------------|
| Enzootic pneumonia ( <i>Mycoplasma hyopneumoniae</i> )     |                                    |                                     |
| PRRS virus (blue ear disease)                              |                                    |                                     |
| PCV2 (porcine circovirus – PMWS)                           |                                    |                                     |
| Glässer's disease ( <i>Haemophilus parasuis</i> )          |                                    |                                     |
| Erysipelas                                                 |                                    |                                     |
| Porcine parvovirus (PPV)                                   |                                    |                                     |
| Pleuropneumonia ( <i>Actinobacillus pleuropneumoniae</i> ) |                                    |                                     |
| <i>Streptococcus suis</i>                                  |                                    |                                     |
| <i>E. coli</i> (for diarrhoea)                             |                                    |                                     |
| <i>E. coli</i> (for oedema disease)                        |                                    |                                     |
| Clostridial disease (for piglet diarrhoea)                 |                                    |                                     |
| Clostridial disease (for sows – sudden death)              |                                    |                                     |
| Leptospirosis                                              |                                    |                                     |
| Swine influenza                                            |                                    |                                     |
| <i>Salmonella</i>                                          |                                    |                                     |
| <i>Lawsonia</i> (ileitis)                                  |                                    |                                     |
| Other (please state)                                       |                                    |                                     |

**2.3.** Do you know which of the following specific diseases have caused clinical signs or deaths in pigs on your farm in 2016 and/or 2017?

\* Pig age groups:

1. Suckling pigs

2. Weaner – growers

3. Finishers

4. Adults

| Cause                                                           | Disease                                     | Disease not seen<br><i>Please tick</i> | Disease occurrence suspected<br><i>Please tick</i> | Disease confirmed by vet<br><i>Please tick</i> | Don't know<br><i>Please tick</i> | What age* of pig was affected/most affected |
|-----------------------------------------------------------------|---------------------------------------------|----------------------------------------|----------------------------------------------------|------------------------------------------------|----------------------------------|---------------------------------------------|
| <b>RESPIRATORY DISEASE</b>                                      |                                             |                                        |                                                    |                                                |                                  |                                             |
| 2.3.1 <i>Mycoplasma hyopneumoniae</i>                           | Enzootic pneumonia                          |                                        |                                                    |                                                |                                  |                                             |
| 2.3.2 PRRS virus                                                | PRRS                                        |                                        |                                                    |                                                |                                  |                                             |
| 2.3.3 Swine influenza virus                                     | Swine influenza                             |                                        |                                                    |                                                |                                  |                                             |
| 2.3.4 <i>Pasteurella multocida</i>                              | Pneumonia due to pasteurellosis             |                                        |                                                    |                                                |                                  |                                             |
| 2.3.5 <i>Actinobacillus pleuropneumoniae</i>                    | Pleuropneumonia                             |                                        |                                                    |                                                |                                  |                                             |
| 2.3.6                                                           | Other (please state)                        |                                        |                                                    |                                                |                                  |                                             |
|                                                                 |                                             |                                        |                                                    |                                                |                                  |                                             |
| <b>GENERALISED</b>                                              |                                             |                                        |                                                    |                                                |                                  |                                             |
| 2.3.7 <i>Streptococcus suis</i>                                 | Strep septicaemia (inc meningitis/lameness) |                                        |                                                    |                                                |                                  |                                             |
| 2.3.8 <i>Haemophilus parasuis</i>                               | Glässer's disease                           |                                        |                                                    |                                                |                                  |                                             |
| 2.3.9 <i>Erysipelothrix rhusiopathiae</i>                       | Erysipelas                                  |                                        |                                                    |                                                |                                  |                                             |
| 2.3.10 Porcine circovirus 2 (PCV-2)                             | PMWS and PCVAD (wasting disease)            |                                        |                                                    |                                                |                                  |                                             |
| 2.3.11 PCV2-related                                             | PDNS                                        |                                        |                                                    |                                                |                                  |                                             |
| 2.3.12                                                          | Other (please state)                        |                                        |                                                    |                                                |                                  |                                             |
|                                                                 |                                             |                                        |                                                    |                                                |                                  |                                             |
| <b>NERVOUS DISEASE (Strep suis and Glassers included above)</b> |                                             |                                        |                                                    |                                                |                                  |                                             |
| 2.3.13 <i>E. coli</i>                                           | Oedema disease/bowel oedema                 |                                        |                                                    |                                                |                                  |                                             |
| 2.3.14                                                          | Other (please state)                        |                                        |                                                    |                                                |                                  |                                             |
|                                                                 |                                             |                                        |                                                    |                                                |                                  |                                             |

2.3. continued from previous page

| Cause                                                    | Disease                       | Not present<br>Please tick | Disease occurrence suspected<br>Please tick | Disease confirmed by vet<br>Please tick | Don't know<br>Please tick | What age* of pig was affected/most affected |
|----------------------------------------------------------|-------------------------------|----------------------------|---------------------------------------------|-----------------------------------------|---------------------------|---------------------------------------------|
| <b>GUT DISEASE</b>                                       |                               |                            |                                             |                                         |                           |                                             |
| 2.3.15 Clost. perfringens                                | <b>Clostridial enteritis</b>  |                            |                                             |                                         |                           |                                             |
| 2.3.16 Isospora suis                                     | <b>Coccidiosis</b>            |                            |                                             |                                         |                           |                                             |
| 2.3.17 <i>E. coli</i>                                    | <b>E coli diarrhoea</b>       |                            |                                             |                                         |                           |                                             |
| 2.3.18 Rotavirus                                         | <b>Rotavirus diarrhoea</b>    |                            |                                             |                                         |                           |                                             |
| 2.3.19 <i>Salmonella</i> serotypes                       | <b>Clinical salmonellosis</b> |                            |                                             |                                         |                           |                                             |
| 2.3.20 <i>Lawsonia</i>                                   | <b>Ileitis</b>                |                            |                                             |                                         |                           |                                             |
| 2.3.21 <i>Brachyspira hyodysenteriae</i>                 | <b>Swine dysentery</b>        |                            |                                             |                                         |                           |                                             |
| 2.3.22 <i>Brachyspira pilosicoli</i>                     | <b>Pilosicoli colitis</b>     |                            |                                             |                                         |                           |                                             |
| 2.3.23 <i>Ascaris suum</i> (roundworm)                   | <b>Milk spot</b>              |                            |                                             |                                         |                           |                                             |
| 2.3.24                                                   | <b>Intestinal torsions</b>    |                            |                                             |                                         |                           |                                             |
| 2.3.25                                                   | <b>Other (please state)</b>   |                            |                                             |                                         |                           |                                             |
|                                                          |                               |                            |                                             |                                         |                           |                                             |
| <b>SKIN DISEASE</b>                                      |                               |                            |                                             |                                         |                           |                                             |
| 2.3.26 <i>Sarcoptes</i> mite                             | <b>Mange</b>                  |                            |                                             |                                         |                           |                                             |
| 2.3.27 <i>Staphylococcus hyicus</i>                      | <b>Greasy pig</b>             |                            |                                             |                                         |                           |                                             |
| 2.3.28                                                   | <b>Other (please state)</b>   |                            |                                             |                                         |                           |                                             |
|                                                          |                               |                            |                                             |                                         |                           |                                             |
| <b>LAMENESS (Strep suis and Glassers included above)</b> |                               |                            |                                             |                                         |                           |                                             |
| 2.3.29 <i>Mycoplasma hyosynoviae</i>                     | <b>Mycoplasmal arthritis</b>  |                            |                                             |                                         |                           |                                             |
| 2.3.30 <i>OCD</i>                                        | <b>Osteochondrosis</b>        |                            |                                             |                                         |                           |                                             |
| 2.3.31                                                   | <b>Other (please state)</b>   |                            |                                             |                                         |                           |                                             |

Thank you for taking your time to provide this valuable information!
